# Supplementary material
Source: PubMed Central journal article supplement (PMC4884115)
Supplement: ASN.2015040468_ASN2015040468SupplementaryData.pdf [file ASN.2015040468_ASN2015040468SupplementaryData.pdf]

## SUPPLEMENTARY APPENDIX

**Supplementary Figure 1:** Serum 25(OH)Vitamin D Level Over Time Across Randomized Groups By Strata of Baseline 25(OH)Vitamin D Level 1A) Total Study Population 1B) Baseline Serum 25(OH)Vitamin D 16-30 ng/ml and 1C) Baseline Serum 25(OH)Vitamin D  $\leq 15$  ng/ml.

### 1A Full Study Population

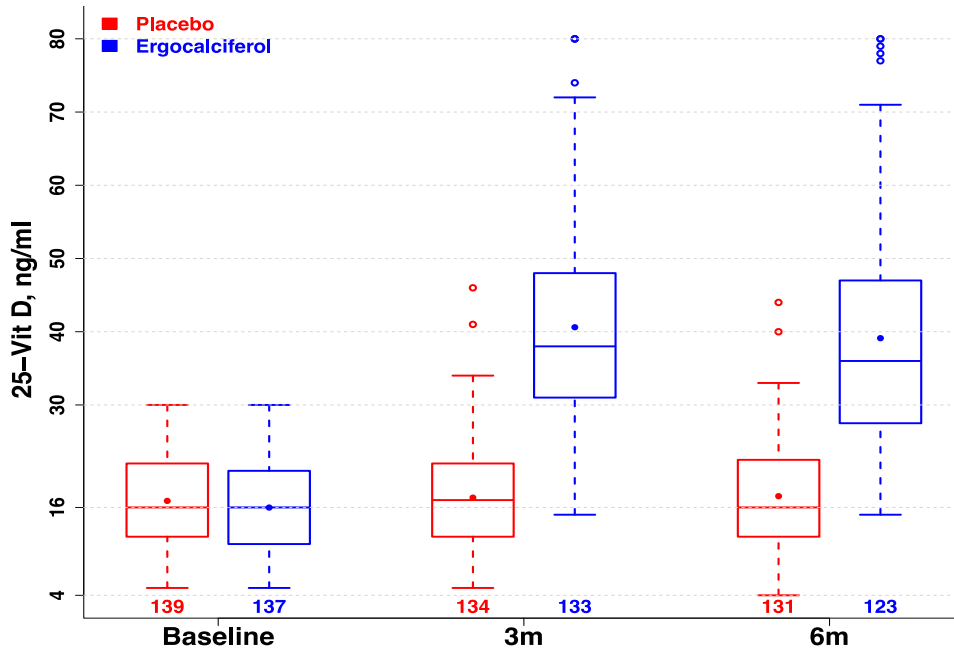

### 1B Subgroup with Baseline Serum 25(OH)Vitamin D 16-30 ng/ml

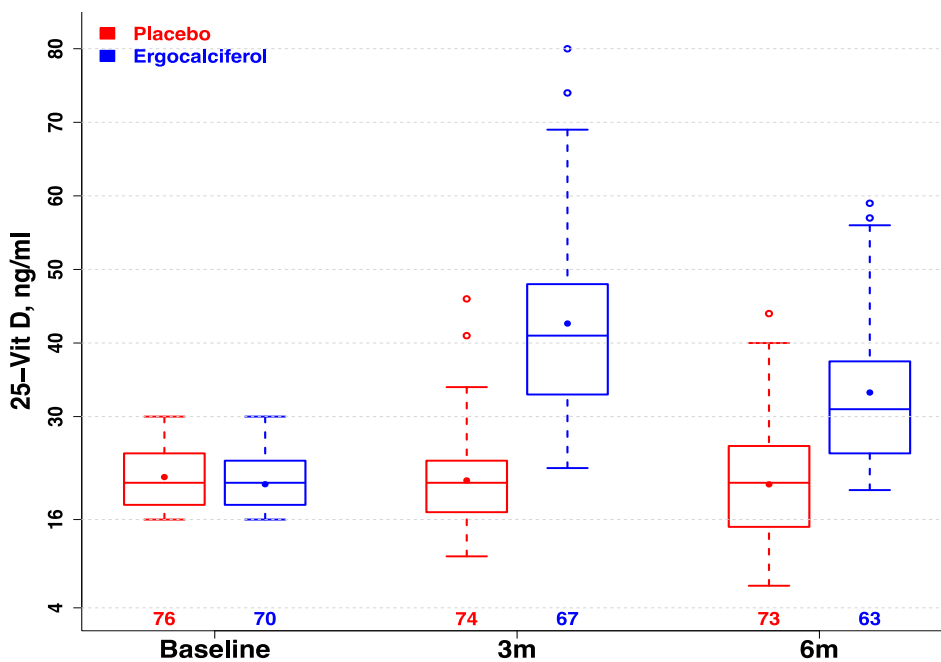

1C 1B Subgroup with Baseline Serum 25(OH)Vitamin D  $\leq 15$  ng/ml

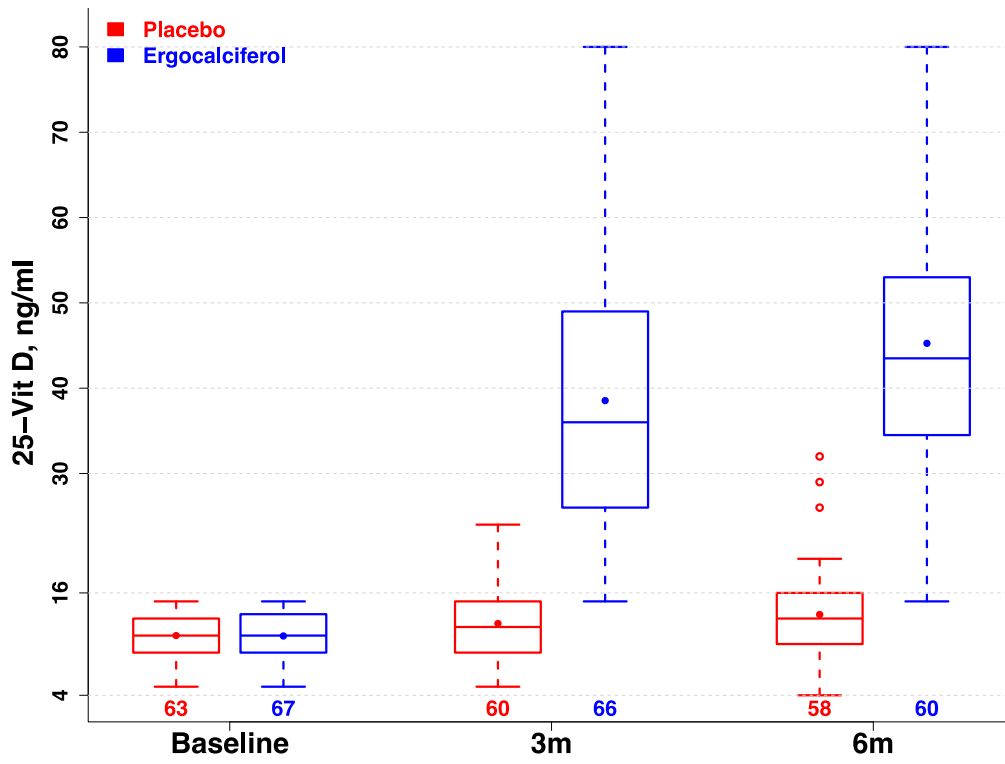

### Supplementary Table 1: Change in Epoetin Dose in Subjects Who Achieved Vs. Did not Achieve 25(OH)Vitamin D<sub>≥</sub>30 ng/ml at 3 or 6 months

We analyzed the EPO dose across strata defined by achieving Vs. not achieving serum 25(OH)D <sub>≥</sub>30 ng/ml 1) at 3 months and 2) at 3 or 6 months. 107 subjects had serum 25(OH)D <sub>≥</sub>30 ng/ml at 3 months and 117, at 3 or 6 months and these were compared with the patients who did not at the respective timepoint.

#### Change in EPO Dose in Subjects Who Achieve Vs. Don't Achieve 25Vit D<sub>≥</sub>30 ng/ml at 3 months

| Parameter               | Achieved VitD <sub>≥</sub> 30 ng/ml at 3 months |                      |                      |                                   |                        | Did Not Achieve Vit D <sub>≥</sub> 30 ng/ml at 3 months |                      |                      |                                  |                        | Btwn Group p value <sup>§</sup> |
|-------------------------|-------------------------------------------------|----------------------|----------------------|-----------------------------------|------------------------|---------------------------------------------------------|----------------------|----------------------|----------------------------------|------------------------|---------------------------------|
|                         | Baseline Value                                  | Month 3 Value        | Month 6 Value        | Model Slope * (95% CI)            | Within Group p-value ‡ | Baseline Value                                          | Month 3 Value        | Month 6 Value        | Model Slope* (95%CI)             | Within Group p-value ‡ |                                 |
| Epoetin Dose units/week | 6000<br>(3100,12000)                            | 6100<br>(3000,10000) | 8000<br>(3000,15000) | 0.98 <sup>^</sup><br>(0.54, 1.02) | 0.26                   | 5000<br>(2000,11800)                                    | 6000<br>(2000,11500) | 7000<br>(2000,13000) | 1.00 <sup>^</sup><br>(0.96,1.05) | 0.99                   | 0.46                            |

#### Change in EPO Dose in Subjects Who Achieve Vs. Don't Achieve Baseline 25Vit D<sub>≥</sub>30 ng/ml at 3 or 6 months

| Parameter               | Achieved VitD <sub>≥</sub> 30 ng/ml at 3 or 6 months |                     |                      |                                   |                        | Did Not Achieve Vit D <sub>≥</sub> 30 ng/ml at 3 or 6 months |                      |                      |                                  |                        | Btwn Group p value <sup>§</sup> |
|-------------------------|------------------------------------------------------|---------------------|----------------------|-----------------------------------|------------------------|--------------------------------------------------------------|----------------------|----------------------|----------------------------------|------------------------|---------------------------------|
|                         | Baseline Value                                       | Month 3 Value       | Month 6 Value        | Model Slope * (95% CI)            | Within Group p-value ‡ | Baseline Value                                               | Month 3 Value        | Month 6 Value        | Model Slope* (95%CI)             | Within Group p-value ‡ |                                 |
| Epoetin Dose units/week | 5800<br>(3000,11600)                                 | 6000<br>(2600,9800) | 7500<br>(2800,16000) | 0.98 <sup>^</sup><br>(0.94, 1.02) | 0.46                   | 5200<br>(2200,12000)                                         | 6000<br>(2000,11550) | 6000<br>(2000,12000) | 1.00 <sup>^</sup><br>(0.96,1.05) | 0.98                   | 0.46                            |

<sup>^</sup> The model slope is the change (95% confidence interval) in a given parameter per month. For non-normally distributed parameters, labeled with <sup>^</sup>, the natural log of the variable was modeled and the interpretation is the percent change per month. For example a β of 0.98 for log Epoetin is interpreted as a 2% decrease in epoetin dose per month

Results are not different from the primary 'intent-to-treat' analysis shown in Table 2 of the manuscript, in which there is no difference in the change in Epoetin across treatment arms with treatment with Ergocalciferol vs. Placebo.

## Handling of Missing Epogen

Of 7629 patient-weeks of observation, 177 (2.3%) were missing. The primary way we handled missing EPO weeks, per the methods, was to carry the last value forward if the absence was <2 weeks, and if longer than 2 weeks, it was left as missing. By these rules, very few patients missed months of Epogen, as shown in the Table.

|                | BL  | 1   | 2   | 3   | 4   | 5   | 6   |
|----------------|-----|-----|-----|-----|-----|-----|-----|
| Placebo        | 139 | 138 | 136 | 135 | 134 | 131 | 130 |
| Ergocalciferol | 137 | 136 | 135 | 134 | 132 | 129 | 122 |

Of the 9 patients in the placebo arm who were missing EPO data in month 6, 4 of these were deaths and 5 were for 'other unspecified reasons'. Of the 15 missing EPO in month 6 in the Ergo arm, 4 were deaths, 1 was a transplant, and 1 was a transfer to a non-participating unit, 9 were for 'other reasons'. Overall this is a small amount of missing data.

We also conducted sensitivity analyses, handling EPO in 2 additional ways

- 1) For all missing epoetin values, regardless of the duration of missingness, carry the last value forward
- 2) Leave all missing epoetin values as missing

Results are no different when we handled EPO missing in these 3 ways, as shown below. We have added this discussion to the Supplementary Appendix.

### Supplementary Table2: Results of Mixed Models using 3 different ways of handling Missing Epoetin

| Version                     | Definition of Missing Epoetin                                        | Ergocalciferol       |                      | Placebo                        |                      | Between Group p value |
|-----------------------------|----------------------------------------------------------------------|----------------------|----------------------|--------------------------------|----------------------|-----------------------|
|                             |                                                                      | Model Slope (95% CI) | Within Group p value | Model Slope (95% CI)           | Within Group p value |                       |
| 1 (Shown in the manuscript) | ≤2 weeks absence last value carried forward; >2 weeks set to missing | 0.99 (0.95, 1.03)    | 0.68                 | 0.98 <sup>^</sup> (0.94, 1.02) | 0.42                 | 0.78                  |
| 2                           | Last value carried Forward                                           | 0.98 (0.94, 1.03)    | 0.45                 | 0.98 (0.94, 1.03)              | 0.44                 | 1.00                  |
| 3                           | Left as missing                                                      | 0.99 (0.95, 1.03)    | 0.58                 | 0.99 (0.95, 1.03)              | 0.74                 | 0.87                  |

**Supplementary Table 3: Antihypertensive Medication Use Over the Course of the Study By Treatment Arm**

|                          | <b>Baseline<br/>(N = 276)</b> | <b>Group A<br/>(N = 139, 50.4%)</b> | <b>Group B<br/>(N = 137, 49.6%)</b> | <b>P</b> |
|--------------------------|-------------------------------|-------------------------------------|-------------------------------------|----------|
| BP medications           |                               |                                     |                                     |          |
| No                       | 66 (24%)                      | 30 (22%)                            | 36 (26%)                            | 0.361    |
| Yes                      | 210 (76%)                     | 109 (78%)                           | 101 (74%)                           |          |
| Number of BP medications |                               |                                     |                                     |          |
| -0-                      | 66 (24%)                      | 30 (22%)                            | 36 (26%)                            | 0.889    |
| -1-                      | 58 (21%)                      | 31 (22%)                            | 27 (20%)                            |          |
| -2-                      | 56 (20%)                      | 30 (22%)                            | 26 (19%)                            |          |
| -3-                      | 51 (18%)                      | 26 (19%)                            | 25 (18%)                            |          |
| >=4                      | 45 (16%)                      | 22 (16%)                            | 23 (17%)                            |          |
|                          |                               |                                     |                                     |          |
|                          | <b>Month 1<br/>(N = 274)</b>  | <b>Group A<br/>(N = 138, 50.4%)</b> | <b>Group B<br/>(N = 136, 49.6%)</b> | <b>P</b> |
| BP medications           |                               |                                     |                                     |          |
| No                       | 67 (25%)                      | 31 (22%)                            | 36 (27%)                            | 0.420    |
| Yes                      | 206 (75%)                     | 107 (78%)                           | 99 (73%)                            |          |
| Number of BP medications |                               |                                     |                                     |          |
| -0-                      | 67 (25%)                      | 31 (22%)                            | 36 (27%)                            | 0.909    |
| -1-                      | 58 (21%)                      | 32 (23%)                            | 26 (19%)                            |          |
| -2-                      | 56 (21%)                      | 28 (20%)                            | 28 (21%)                            |          |
| -3-                      | 49 (18%)                      | 25 (18%)                            | 24 (18%)                            |          |
| >=4                      | 43 (16%)                      | 22 (16%)                            | 21 (16%)                            |          |
|                          |                               |                                     |                                     |          |
|                          | <b>Month 2<br/>(N = 271)</b>  | <b>Group A<br/>(N = 137, 50.6%)</b> | <b>Group B<br/>(N = 134, 49.4%)</b> | <b>P</b> |
| BP medications           |                               |                                     |                                     |          |
| No                       | 66 (24%)                      | 30 (22%)                            | 36 (27%)                            | 0.341    |
| Yes                      | 205 (76%)                     | 107 (78%)                           | 98 (73%)                            |          |
| Number of BP medications |                               |                                     |                                     |          |
| -0-                      | 66 (24%)                      | 30 (22%)                            | 36 (27%)                            | 0.874    |
| -1-                      | 59 (22%)                      | 31 (23%)                            | 28 (21%)                            |          |
| -2-                      | 57 (21%)                      | 30 (22%)                            | 27 (20%)                            |          |
| -3-                      | 47 (17%)                      | 23 (17%)                            | 24 (18%)                            |          |
| >=4                      | 42 (16%)                      | 23 (17%)                            | 19 (14%)                            |          |
|                          |                               |                                     |                                     |          |
|                          | <b>Month 3<br/>(N = 269)</b>  | <b>Group A<br/>(N = 135, 50.2%)</b> | <b>Group B<br/>(N = 134, 49.8%)</b> | <b>P</b> |

|                          |                              |                                     |                                     |          |
|--------------------------|------------------------------|-------------------------------------|-------------------------------------|----------|
| BP medications           |                              |                                     |                                     |          |
| No                       | 66 (25%)                     | 30 (22%)                            | 36 (27%)                            | 0.376    |
| Yes                      | 203 (75%)                    | 105 (78%)                           | 98 (73%)                            |          |
| Number of BP medications |                              |                                     |                                     |          |
| -0-                      | 66 (25%)                     | 30 (22%)                            | 36 (27%)                            | 0.923    |
| -1-                      | 58 (22%)                     | 30 (22%)                            | 28 (21%)                            |          |
| -2-                      | 58 (22%)                     | 31 (23%)                            | 27 (20%)                            |          |
| -3-                      | 46 (17%)                     | 23 (17%)                            | 23 (17%)                            |          |
| >=4                      | 41 (15%)                     | 21 (16%)                            | 20 (15%)                            |          |
|                          |                              |                                     |                                     |          |
|                          | <b>Month 4<br/>(N = 265)</b> | <b>Group A<br/>(N = 133, 50.2%)</b> | <b>Group B<br/>(N = 132, 49.8%)</b> | <b>P</b> |
| BP medications           |                              |                                     |                                     |          |
| No                       | 63 (24%)                     | 28 (21%)                            | 35 (27%)                            | 0.265    |
| Yes                      | 200 (76%)                    | 105 (79%)                           | 95 (73%)                            |          |
| Number of BP medications |                              |                                     |                                     |          |
| -0-                      | 63 (24%)                     | 28 (21%)                            | 35 (27%)                            | 0.812    |
| -1-                      | 57 (22%)                     | 31 (23%)                            | 26 (20%)                            |          |
| -2-                      | 58 (22%)                     | 31 (23%)                            | 27 (21%)                            |          |
| -3-                      | 45 (17%)                     | 22 (17%)                            | 23 (18%)                            |          |
| >=4                      | 40 (15%)                     | 21 (16%)                            | 19 (15%)                            |          |
|                          |                              |                                     |                                     |          |
|                          | <b>Month 5<br/>(N = 259)</b> | <b>Group A<br/>(N = 132, 51.0%)</b> | <b>Group B<br/>(N = 127, 49.0%)</b> | <b>P</b> |
| BP medications           |                              |                                     |                                     |          |
| No                       | 60 (23%)                     | 26 (20%)                            | 34 (27%)                            | 0.177    |
| Yes                      | 199 (77%)                    | 106 (80%)                           | 93 (73%)                            |          |
| Number of BP medications |                              |                                     |                                     |          |
| -0-                      | 60 (23%)                     | 26 (20%)                            | 34 (27%)                            | 0.408    |
| -1-                      | 55 (21%)                     | 30 (23%)                            | 25 (20%)                            |          |
| -2-                      | 55 (21%)                     | 33 (25%)                            | 22 (17%)                            |          |
| -3-                      | 48 (19%)                     | 22 (17%)                            | 26 (20%)                            |          |
| >=4                      | 41 (16%)                     | 21 (16%)                            | 20 (16%)                            |          |
|                          |                              |                                     |                                     |          |
|                          | <b>Month 6<br/>(N = 255)</b> | <b>Group A<br/>(N = 131, 51.4%)</b> | <b>Group B<br/>(N = 124, 48.6%)</b> | <b>P</b> |
| BP medications           |                              |                                     |                                     |          |

|                          |           |           |          |       |
|--------------------------|-----------|-----------|----------|-------|
| No                       | 55 (22%)  | 23 (18%)  | 32 (26%) | 0.109 |
| Yes                      | 200 (78%) | 108 (82%) | 92 (74%) |       |
| Number of BP medications |           |           |          |       |
| -0-                      | 55 (22%)  | 23 (18%)  | 32 (26%) | 0.356 |
| -1-                      | 62 (24%)  | 36 (27%)  | 26 (21%) |       |
| -2-                      | 50 (20%)  | 29 (22%)  | 21 (17%) |       |
| -3-                      | 47 (18%)  | 22 (17%)  | 25 (20%) |       |
| >=4                      | 41 (16%)  | 21 (16%)  | 20 (16%) |       |
